# Supplementary material
Source: ML conference proceedings conference paper supplement (https://www.ecva.net/papers/eccv_2022/papers_ECCV/html/136830154_ECCV_2022_paper.php)
Supplement: Supplementary file 1 [file 136830154-supp.pdf]

# Supplementary Material: Outpainting by Queries

## A Additional Quantitative Results

|    | Methods     | Scenery       |              |               | Building Facades |              |               | WikiArt       |              |               |
|----|-------------|---------------|--------------|---------------|------------------|--------------|---------------|---------------|--------------|---------------|
|    |             | FID↓          | IS↑          | PSNR↑         | FID↓             | IS↑          | PSNR↑         | FID↓          | IS↑          | PSNR↑         |
| 1× | Lower Bound | 160.174       | 3.595        | 9.569         | 123.678          | 4.356        | 9.810         | 139.956       | 5.073        | 10.215        |
|    | SRN         | 45.296        | 3.540        | 22.433        | 34.058           | 4.722        | 18.839        | 65.675        | 4.933        | <b>20.467</b> |
|    | NSIPO       | 35.606        | 3.475        | 21.630        | 33.140           | 4.529        | 18.460        | 30.338        | 6.231        | 18.929        |
|    | IOH         | 23.410        | 3.578        | 22.839        | 33.525           | <u>4.739</u> | 18.812        | 24.539        | 6.679        | 19.808        |
|    | Uformer     | <u>23.216</u> | <u>3.691</u> | <u>23.054</u> | <u>32.228</u>    | 4.651        | <u>18.892</u> | <u>18.808</u> | <u>7.466</u> | 19.708        |
|    | QueryOTR    | <b>20.366</b> | <b>3.955</b> | <b>23.604</b> | <b>22.378</b>    | <b>4.978</b> | <b>19.680</b> | <b>14.955</b> | <b>7.896</b> | 20.388        |
|    |             |               |              |               |                  |              |               |               |              |               |
| 2× | Lower Bound | 201.871       | 2.097        | 7.868         | 196.650          | 2.875        | 8.047         | 230.893       | 2.477        | 8.557         |
|    | SRN         | 97.989        | 2.724        | 18.459        | 75.121           | 3.837        | 15.431        | 139.395       | 3.045        | <u>16.759</u> |
|    | NSIPO       | 69.683        | <u>3.235</u> | 17.701        | <u>65.319</u>    | 3.771        | 15.287        | 67.880        | 4.888        | 15.721        |
|    | IOH         | <u>45.108</u> | 3.047        | 18.846        | 72.053           | 3.727        | 15.519        | 66.953        | 5.065        | 16.127        |
|    | Uformer     | 50.605        | 3.099        | <u>18.934</u> | 71.306           | <u>3.924</u> | <u>15.626</u> | <u>51.263</u> | <u>6.098</u> | 15.936        |
|    | QueryOTR    | <b>39.237</b> | <b>3.431</b> | <b>19.358</b> | <b>41.273</b>    | <b>4.547</b> | <b>16.213</b> | <b>43.757</b> | <b>6.341</b> | <b>17.074</b> |
|    |             |               |              |               |                  |              |               |               |              |               |
| 3× | Lower Bound | 227.268       | 1.991        | 7.242         | 223.224          | 2.378        | 7.384         | 260.623       | 2.258        | 7.919         |
|    | SRN         | 141.040       | 2.483        | 16.141        | 114.016          | 3.312        | 13.777        | 181.394       | 2.407        | <u>14.620</u> |
|    | NSIPO       | 101.411       | <b>3.131</b> | 15.384        | <u>92.041</u>    | <u>3.628</u> | 13.741        | 94.176        | 4.325        | 14.159        |
|    | IOH         | <u>67.591</u> | 2.723        | 16.351        | 104.337          | 2.956        | 13.913        | 104.032       | 4.190        | 13.943        |
|    | Uformer     | 76.318        | 2.799        | <u>16.374</u> | 105.539          | 3.315        | <u>14.065</u> | <u>79.322</u> | <b>5.954</b> | 13.411        |
|    | QueryOTR    | <b>60.977</b> | 3.114        | <b>16.864</b> | <b>64.926</b>    | <b>4.612</b> | <b>14.316</b> | <b>69.951</b> | 5.683        | <b>15.294</b> |
|    |             |               |              |               |                  |              |               |               |              |               |
|    | Up Bound    | 0             | 4.184        | +∞            | 0                | 5.660        | +∞            | 0             | 8.779        | +∞            |

Table S1: Quantitative results follow our setting that **replacing the center region with input sub-images surrounded by the extrapolated parts.**

The comparative methods are all based on image-to-image translation, which need to reconstruct the input sub-image, whilst the sequence-to-sequence based method QueryOTR does not need to reconstruct the input sub-image only outputting the extrapolated regions. In the main manuscript, we report the best results of comparative methods by keeping the reconstructed regions, which were consistent with their original settings. All things being equal, [Table S1](#) reports the results following our setting that replaces the center region with the input sub-image. We additionally report the lower bound of each metric by filling the extrapolated regions with zero pixel values. As shown in [Table S1](#), our proposed QueryOTR outperforms other methods in most cases, indicating that the higher performance of our method contributes little on the use of the input sub-image. Instead, the results demonstrate the superiority of our method on generating the

extrapolated regions. On the other hand, all the comparative methods have an improvement of IS and PSNR metrics due to replacing the center regions with the input sub-image.

## B Details of Datasets

**Scenery** is a natural scenery dataset consisting of about 5,000 images in the training set and 1,000 images in the testing set. The images are very diverse and complicated, which contains natural scenes, e.g., snow, valley, seaside, riverbank, sky, and mountain.

**Building Facades** is a city scenes dataset consisting of about 16,000 and 1,500 images for training set and testing set respectively. It contains building architecture and city scenes.

**WikiArt** is a fine-art paintings dataset obtained from the wikiart.org website. We use the split manner of genres datasets, which contains 45,503 training images and 19,492 testing images.

## C Inference Time

The comparison of inference time can be referred in [Table S2](#). Due to the simple but effective design of QueryOTR, our framework is almost three times faster than Uformer which is also engaged with a vision transformer (Swin Transformer) architecture.

| Method                | SRN    | NSIPO  | IOH   | Uformer | QueryOTR |
|-----------------------|--------|--------|-------|---------|----------|
| Time usage (ms/image) | 11.960 | 44.190 | 4.160 | 46.810  | 13.345   |

Table S2: Comparison on inference time.

## D Hard Examples

We illustrate some hard examples that QueryOTR can work significantly better than the other methods. As shown in [Figure S1](#), extrapolating the images with simple colour stripes is very challenging, which requires the network to recognize the pattern and mimic it, especially when such samples are not enough in the training set. The CNN-based methods have limitations to generalize well on such samples, whilst the transformer-based Uformer can generate colorful lines but not straight. In contrast, QueryOTR takes advantage of querying the input sub-image to generate color and straight lines, generating much better images.

## E More Qualitative Results

We present more comparative results for one-step and multi-step outpainting. In [Figure S2](#), we show additional results on Scenery and WikiArt datasets. Similarly, in [Figure S3](#), we provide more results on Building Facades dataset compared with other methods. Meanwhile, we visualize the results conducted by QueryOTR in [Figure S4](#).

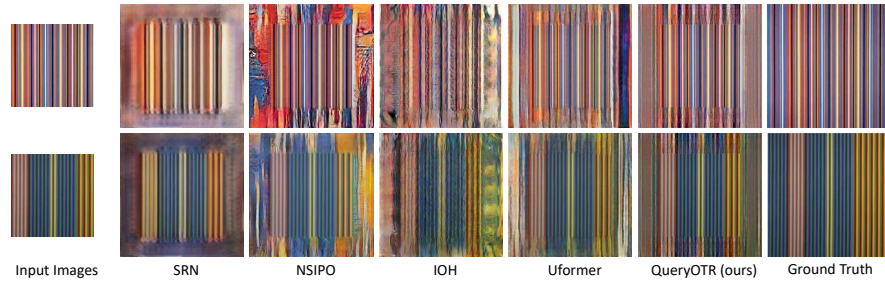

Fig. S1: Visualization of some hard examples in the test set of WikiArt dataset.

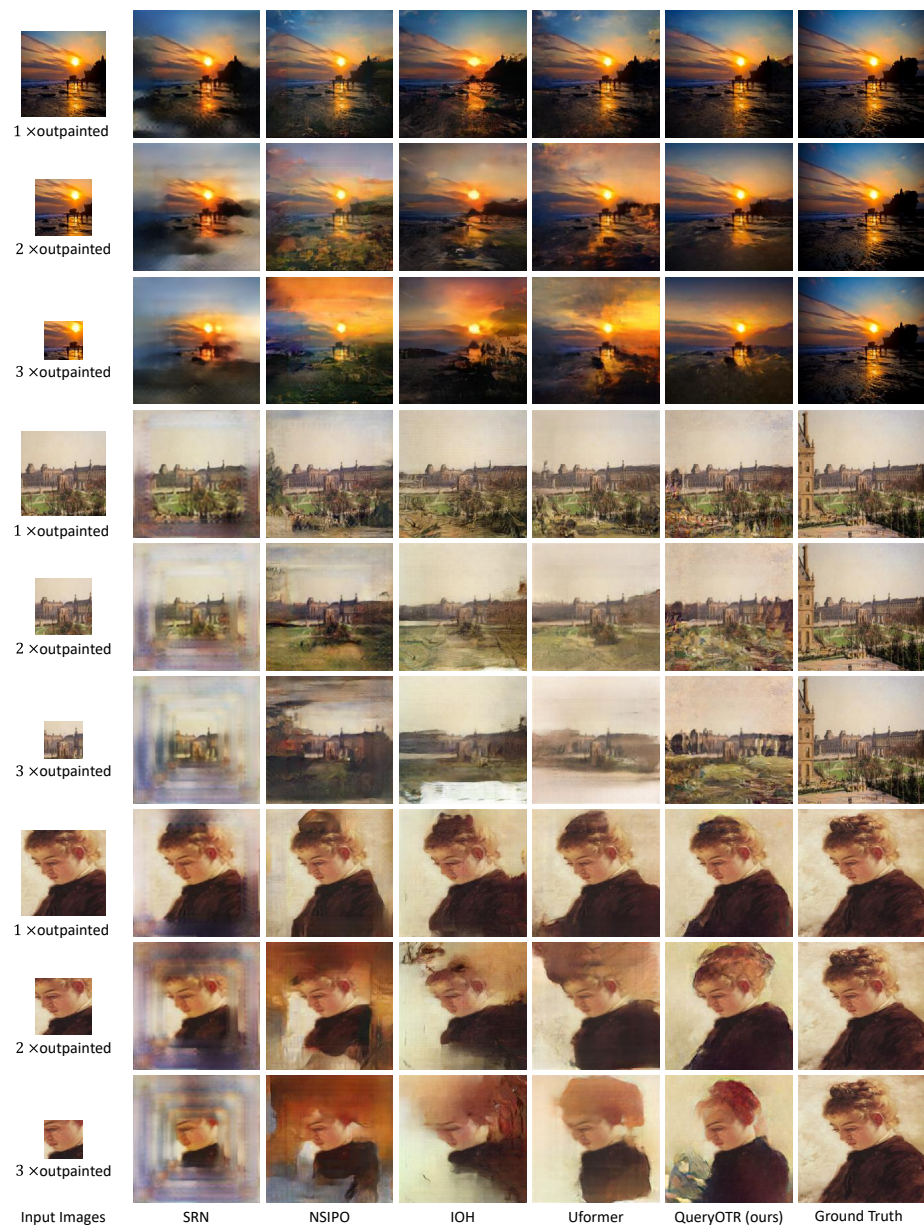

Fig. S2: Qualitative comparison results on Scenery and WikiArt datasets.



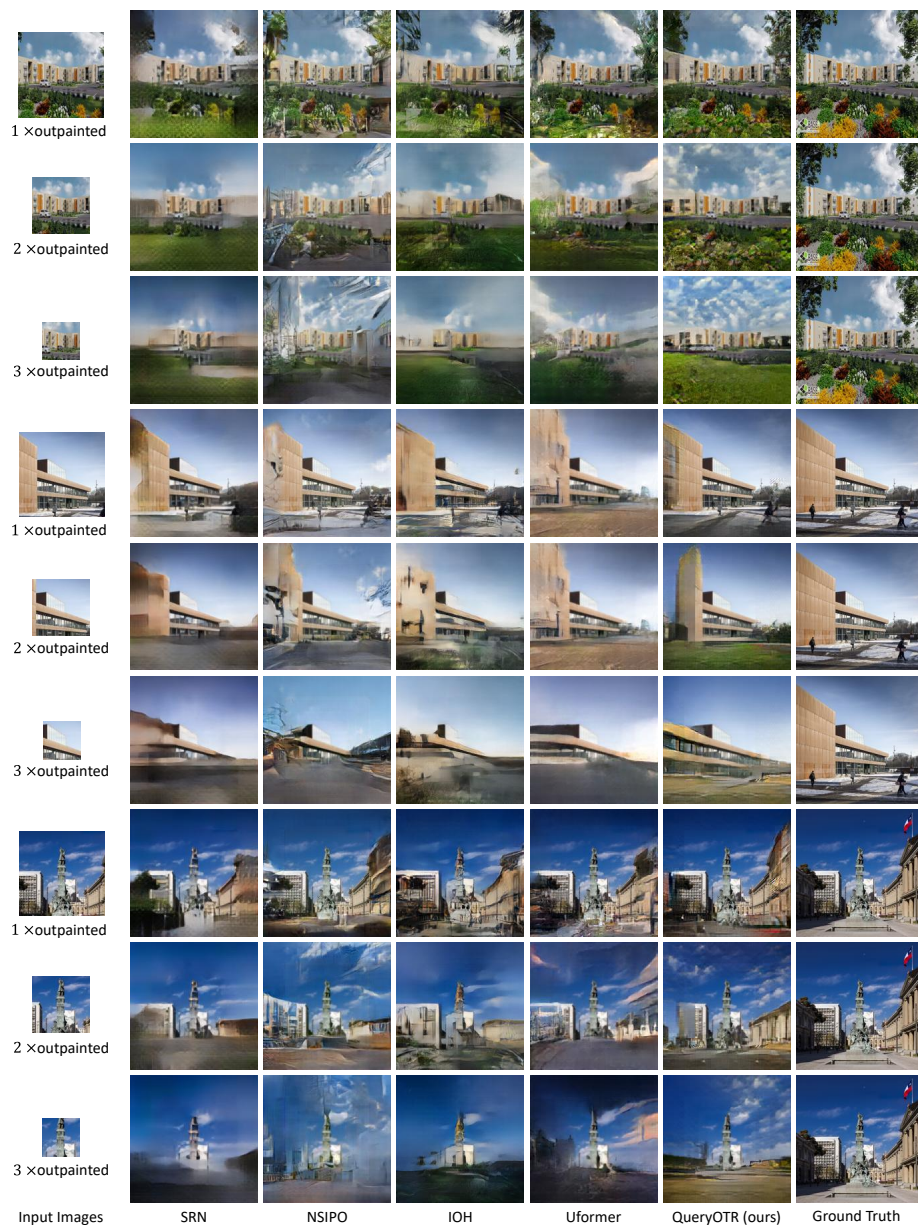

Fig. S3: Qualitative comparison results on Building Facades dataset.

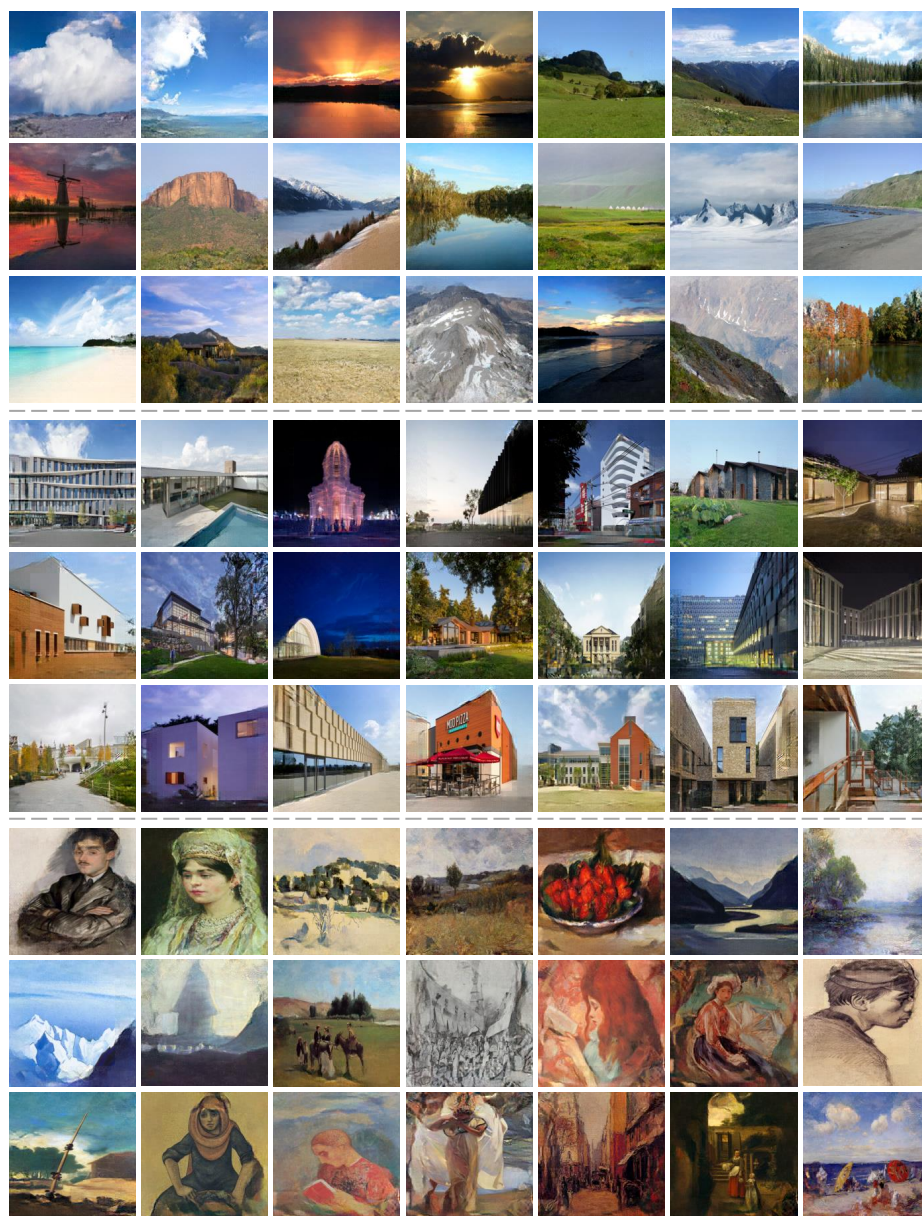

Fig. S4: Visualization of QueryOTR one-step outpainting.
